# Supplementary material for: Comparative Genomics Supports That Brazilian Bioethanol Saccharomyces cerevisiae Comprise a Unified Group of Domesticated Strains Related to Cachaça Spirit Yeasts
Source: Front Microbiol. 2021 Apr 15;12:644089. doi: 10.3389/fmicb.2021.644089 (PMC8082247; doi:10.3389/fmicb.2021.644089)
Supplement: Supplementary file 3 [file Table_1.xlsx]

## Sheet: Supp_Table_1
SUPPLEMENTARY TABLE 1 | Brazilian bioethanol strains (also including cachaça strains) whose genomes have been analyzed in this work.
Isolate name	Short name	Isolation	Genome project accession number
PE-2	H3	Ethanol plant “Usina da Pedra”, Serrana, SP (1994) (Basso et al., 2008). Monosporic isolate, this work	PRJEB31792 (this work)
PE-2	H4	Ethanol plant “Usina da Pedra”, Serrana, SP (1994) (Basso et al., 2008). Monosporic isolate, this work	PRJEB31792 (this work)
PE-2	JAY291	Ethanol plant “Usina da Pedra”, Serrana, SP (1994) (Basso et al., 2008). Monosporic isolate, Argueso et al., 2009	ASM18231v2 (Argueso et al., 2009)
BG-1	BG-1	Ethanol plant “Usina Barra Grande”, Lençóis Paulista, SP (1993) (Basso et al., 2008)	MSHP00000000.1 (Coutouné et al., 2017)
CBS7962	AEG	Fermenting concentrated syrup (sugar cane) (CBS collection)	PRJEB13017 (Peter et al., 2018); https://www.genoscope.cns.fr/yeast/ (Istace et al., 2017)
CBS7964	AEH	Fermenting concentrated syrup (sugar cane) (CBS collection)	PRJEB13017 (Peter et al., 2018)
CBS7960	AFD	Factory producing ethanol (sugar cane syrup) (CBS collection)	PRJEB13017 (Peter et al., 2018)
CBS7959	AFR	Factory producing ethanol (sugar cane syrup) (CBS collection)	PRJEB13017 (Peter et al., 2018)
CBS7961	AGM	Fermenting concentrated syrup (sugar cane) (CBS collection)	PRJEB13017 (Peter et al., 2018)
CBS7963	AHC	Fermenting concentrated syrup (sugar cane) (CBS collection)	PRJEB13017 (Peter et al., 2018)
VF8_(6)	APG	Sao Joao sugar mill, Araras, SP (Antonangelo et al., 2013)	PRJEB13017 (Peter et al., 2018)
RP.10.4	BVA	Rio Pardo sugar mill, Avaré, SP (2010) (Antonangelo et al., 2013)	PRJEB13017 (Peter et al., 2018)
RP.10.13	BVB	Rio Pardo sugar mill, Avaré, SP (2010) (Antonangelo et al., 2013)	PRJEB13017 (Peter et al., 2018)
RP.10.14	BVC	Rio Pardo sugar mill, Avaré, SP (2010) (Antonangelo et al., 2013)	PRJEB13017 (Peter et al., 2018)
SM.9.1.AL1	BVD	São Manoel sugar mill, São Manuel, SP (2009) (Antonangelo et al., 2013)	PRJEB13017 (Peter et al., 2018)
SM.9.1.BL7	BVE	São Manoel sugar mill, São Manuel, SP (2009) (Antonangelo et al., 2013)	PRJEB13017 (Peter et al., 2018)
SM.9.2.BR3(L)	BVF	São Manoel sugar mill, São Manuel, SP (2009) (Antonangelo et al., 2013)	PRJEB13017 (Peter et al., 2018)
SM.9.4.BL2	BVG	São Manoel sugar mill, São Manuel, SP (2009) (Antonangelo et al., 2013)	PRJEB13017 (Peter et al., 2018)
SM.9.4.BR1	BVH	Santa Adélia sugar mill, Jaboticabal, SP (2009) (Antonangelo et al., 2013)	PRJEB13017 (Peter et al., 2018)
SM.9.4.BR2	CMT	São Manoel sugar mill, São Manuel, SP (2009) (Antonangelo et al., 2013)	PRJEB13017 (Peter et al., 2018)
SM.8.2.C13	CNB	São Manoel sugar mill, São Manuel, SP (2008) (Antonangelo et al., 2013)	PRJEB13017 (Peter et al., 2018)
SM.8.7.L8	CNE	São Manoel sugar mill, São Manuel, SP (2008) (Antonangelo et al., 2013)	PRJEB13017 (Peter et al., 2018)
SM.8.7.L9	CNF	São Manoel sugar mill, São Manuel, SP (2008) (Antonangelo et al., 2013)	PRJEB13017 (Peter et al., 2018)
SM.8.7.BR1	CNG	São Manoel sugar mill, São Manuel, SP (2008) (Antonangelo et al., 2013)	PRJEB13017 (Peter et al., 2018)
SM.8.8.BL1	CNH	São Manoel sugar mill, São Manuel, SP (2008) (Antonangelo et al., 2013)	PRJEB13017 (Peter et al., 2018)
SM.8.8.CVR1	CNI	São Manoel sugar mill, São Manuel, SP (2008) (Antonangelo et al., 2013)	PRJEB13017 (Peter et al., 2018)
SA.1.5.	CNK	Santa Adélia sugar mill, Jaboticabal, SP (2009) (Antonangelo et al., 2013)	PRJEB13017 (Peter et al., 2018)
SA.9.2.BL3	CNL	Santa Adélia sugar mill, Jaboticabal, SP (2009) (Antonangelo et al., 2013)	PRJEB13017 (Peter et al., 2018)
SA.9.3.VR1	CNM	Santa Adélia sugar mill, Jaboticabal, SP (2009) (Antonangelo et al., 2013)	PRJEB13017 (Peter et al., 2018)
SA.9.4.VL4	CNN	Santa Adélia sugar mill, Jaboticabal, SP (2009) (Antonangelo et al., 2013)	PRJEB13017 (Peter et al., 2018)
SA.9.4.BR2	CNP	Santa Adélia sugar mill, Jaboticabal, SP (2009) (Antonangelo et al., 2013)	PRJEB13017 (Peter et al., 2018)
SA.10.1.VL1	CNQ	Santa Adélia sugar mill, Jaboticabal, SP (2010) (Antonangelo et al., 2013)	PRJEB13017 (Peter et al., 2018)
SA.10.1.VR4	CNR	Santa Adélia sugar mill, Jaboticabal, SP (2010) (Antonangelo et al., 2013)	PRJEB13017 (Peter et al., 2018)
RP11.4.1	CNS	Rio Pardo Sugar Mill, Avaré, SP (2011) (Antonangelo et al., 2013)	PRJEB13017 (Peter et al., 2018)
RP11.4.11	CNT	Rio Pardo Sugar Mill, Avaré, SP (2011) (Antonangelo et al., 2013)	PRJEB13017 (Peter et al., 2018); https://www.genoscope.cns.fr/yeast/ (Istace et al., 2017)
RP11.4.14	CNV	Bioethanol. Rio Pardo Sugar Mill, Avaré, SP (2011) (Antonangelo et al., 2013)	PRJEB13017 (Peter et al., 2018)
Catanduva-1 (CAT-1)*	BI002	Ethanol plant Usina Catanduva, Ariranha, SP (1998) (Basso et al., 2008)	MBWC00000000 (Gallone et al., 2016; Babrzadeh et al., 2012)
VR-1**	BI005	Ethanol plant, São Paulo State (1994) (Basso et al., 2008)	MBVZ00000000 (Gallone et al., 2016)
Spirits004	SP004	Cachaça Spirit, Brazil (Gallone et al., 2016)	MBVI00000000 (Gallone et al., 2016)
Spirits005	SP005	Cachaça Spirit, Brazil (Gallone et al., 2016)	MBVH00000000 (Gallone et al., 2016)
Spirits006	SP006	Cachaça Spirit, Brazil (Gallone et al., 2016)	MBVG00000000 (Gallone et al., 2016)
M1.1	APH	Cachaça. Muller Industry, Pirassununga, SP (2011) (Antonangelo et al., 2013)	PRJEB13017 (Peter et al., 2018)
M.9.1	BTT	Cachaça. Muller Industry, Pirassununga, SP (2011) (Antonangelo et al., 2013)	PRJEB13017 (Peter et al., 2018)
M.14.1	BTV	Cachaça. Muller Industry, Pirassununga, SP (2011) (Antonangelo et al., 2013)	PRJEB13017 (Peter et al., 2018)
* Strain name according to the BioSample SAMN05190465
** Strain name according to the BioSample SAMN05190468

## Sheet: Supp_Table_2
SUPPLEMENTARY TABLE 2 | Queries and selection criteria for BLASTN searches of specific genetic features across 1,020 yeast strains.
Genetic features	Query source and genome coordinate		Selection criteria						BLASTN parameters for all searches
Region B (five genes)	H4 Chr. VI: 206955..223888		HSPs covering at least 3 out the 5 genes. Absence of the region B usually gives no hits or short length HSPs						Match/Mismatch and Gap Costs: Match=1, Mismatch=-1, Existence=2, Extension=1; Expectation value = 0.00001; Word size = 10; Filter low complexity = No
MPR1	H4 Chr. VI: 7691..8380		Overlap >50%; Identity > 85%
CSS3-like (non-S288C)	H4 Chr. II : complement(4678..5193)		Overlap >50%; Identity >95 % (usually the S288C type has up to 93% identity, while the H4 form has close to 100%)
14.1 kb region on Chr. VI	H4 Chr. VI: 32304..46386		Overlap >50%
IRC7 (non-S288C)	H4 Chr. VI: 296300..297505		Overlap >50%; Identity >85 % (usually the S288C type has up to 85% identity, while the H4 form has close to 100%)
SAM-dependent methyltransferase	H4 Chr. IX: complement(424342..425199)		Overlap >50%; Identity >80 %.
HO 97 bp deletion	S288C HO gene on Chr. IV: complement(46271..48031). S288C genome accession number: GCA_000146045.2		97 bp deletion (positions 1575..1671) produces 2 HSPs of 89% overlap and 5% overlap, respectively. Visual checking for the presence of deletion
EO220_5693	H4 Chr. XVI: complement(50521..51639)		Overlapping >80%; Identity >95 %
AQY1 A881Del	S288C AQY1 gene on Chr XVI: 921860..922777		Overlapping >95% Identity > 95%; 1 GAP; visual inspection
AQY2 loss-of-function alleles*	YPS163 AQY2: Contig127.6, position 1262..2131, GenBank accession number ABPD01001370.1		Visual inspection over the regions
Absence** of AQY3	S288C AQY3 on Chr. XVI: complement(20847..22787)		Criteria for presence: overlapping >50%; Identity >85 %; (usually the presence of a AQY3 gene gives a HSP covering the full length of the query)
Deletion** of FRE3 3' region	S288C FRE3 3' region on Chr. XV: 1057369..1057680		Criteria for presence: overlapping >50%; Identity >85 %; (usually the presence of a of FRE3 3' region gives a HSP covering the full length of the query)
Absence** of FIT2	S288C FIT2 on Chr. XV: 1059531..1059992		Criteria for presence: overlapping >50%; Identity >85 %; (usually the presence of a FIT2 gene gives a HSP covering the full length of the query).
Absence** of FIT3	S288C FIT3 on Chr. XV: complement(1060441..1061055)		Criteria for presence: overlapping >50%; Identity >85 %; (usually the presence of a FIT3 gene gives a HSP covering the full length of the query).
Absence** of FRE5	S288C FRE5 gene on Chr. XV : 1061564..1063648		Criteria for presence: overlapping >50%; Identity >90 % ID; (usually the presence of a FRE5 gene gives a HSP covering the full length of the query).
FRE3 A1502 Ins	S288C FRE3 segment on Chr. XV: 1056969..1057138		Overlapping >90 %; Identity >90%; 1 gap; Visual inspection
AFT1 C1942T (stop codon)	S288C AFT1 segment on Chr. VII : 373870..374025		Overlapping >90 %; Identity >90%; Visual inspection
OPT2 loss-of-function alleles*	S288C OPT2 on Chr. XVI: complement(924304..926937)		Visual inspection over the regions
Absence** of ARN2	S288C ARN2 gene on Chr. VIII : complement(8351..10213)		Criteria for presence: overlapping >50%; Identity >90 % ID; (usually the presence of a ARN2 gene gives a HSP covering the full length of the query)
Absence** of ENB1	S288C ENB1 gene on Chr. XV : complement(19491..21311)		Criteria for presence: overlapping >50%; Identity >90 % ID; (usually the presence of a ENB1 gene gives a HSP covering the full length of the query)
* Alleles described on Figure 3 and in the main text
**When the BLASTN criteria for presence is not met

## Sheet: Supp_Table_3
SUPPLEMENTARY TABLE 3 | Copy numbers calculations for key genes/regions of H3 as a template for calculations for further 41 bioethanol strains and 10 controls.
Group or Gene	Justification of choice	Explanation about calculation of CNVs on column L	Genes used for calculations	Coordinates on the genome	Coordinates on the mapping reference (Supplementary Sequence File 1)	Size (gene/region)	H3 background reads coverage	Total nucleotides (from Illumina reads) mapped over the gene/region (i.e., read depth)	Calculated copy numbers of the gene/region	Copy numbers of the group in H3	Copy numbers of the group in S288C	Differential CNVs (H3 minus S288C copies); (Heat map data, Figure 4)
Quinone oxidoreductases	H3 and H4 have duplications of YCR102C and YNL134C.	Three loci were chosen because they differ slightly from each other. The representation of quinone oxidoreductase copies (column L) is given by the sum of the relative CNV over the three loci.	YCR102C	S288C, Chr. III: complement(304361..305467)	1001..2107	1107	190.8	637233	3.01698	6.23989	3	3.23989
			YNL134C	S288C, Chr. XIV: complement(372451..373581)	4108..5238	1131	190.8	445863	2.06614
			YLR460C	S288C, Chr. XII: complement(1059757..1060887)	224582..225712	1131	190.8	249624	1.15677
SEO1	H3 and H4 have a duplication of SEO1 on the chromosome I.	SEO1 and SEO2 two copies resulted from the duplication of chromosome I left and right arms. CNV over SEO1 is calculated.	SEO1	S288C, Chr. I: complement(7235..9016)	7239..9020	1782	190.8	656151	1.92982	1.92982	1	0.929824
CSS3-like	H3 and H4 have a paralog more distant from the S288C CSS3 (92% ID). H4 has the S288C-related copy and the additional paralog, while H3 has only the non-S288C version.	The representation of CSS3-like copies is given by the sum of relative CNV over the two loci.	CSS3	S288C, Chr. XV: complement(17281..17796)	11021..11536	516	190.8	310	0.00314872	1.09679	1	0.0967895
			EO220_0091	H4, Chr. II: complement(4678..5193)	227190..227705	516	190.8	107672	1.09364
ENA1/2/5	S288C has three paralogs, while H3 and H4 have only two.	The representation of ENA1/2/5 copies is given by the sum of relative CNV over the three loci.	ENA5	S288C, Chr. IV: complement(527422..530697)	13537..16812	3276	190.8	605697	0.969021	2.15397	3	-0.84603
			ENA2	S288C, Chr. IV: complement(531307..534582)	17422..20697	3276	190.8	414588	0.663276
			ENA1	S288C, Chr. IV: complement(535192..538467)	21307..24582	3276	190.8	326077	0.521672
MPH2(3)/SOR2(1) region	S288C has two copies of the region, while H3 and H4 have none.	The representation of the copy number of the region copies is given by the sum of relative CNV over the two loci, divided by two.	MPH2	S288C, Chr. IV: 5985..7814	26773..28602	1830	190.8	1040	0.00297854	0.00150879	2	-1.99849
			SOR2	S288C, Chr. IV: complement(8683..9756)	29471..30544	1074	190.8	8	3.90398e-05
ADH7/RDS1/AAD3 region	H4 has 2 copies (Chr. III and VII), while H3 (Chr. XI) and S288C (Chr. III) have one.	For calculation only ADH7 and RDS1 are considered, since ADD3 has many paralogs. Therefore the copy number of the region is the sum of relative CNV over ADH7 plus RDS1, divided by two.	ADH7	S288C, Chr. III: 309070..310155	35875..36960	1086	190.8	197273	0.952049	0.927491	1	-0.0725086
			RDS1	S288C, Chr. III: 310958..313456	37763..40261	2499	190.8	430527	0.902934
DDI2-like	Several copies in bioethanol strains.	The representation of DDI2-like copies is given by the sum of relative CNV over the three loci.	DDI2	S288C, Chr. VI: 9545..10222	45852..46529	678	190.8	332681	2.5717	4.8438	2	2.8438
			DDI2-7	H4, unitig 521: complement(6939..7676)	87514..88251	738	190.8	317262	2.25311
			DDI2-6	H4, Chr. X: 3519..4211	57606..58298	693	190.8	2510	0.0189829
SNO2-like	Several copies in bioethanol strains.	The representation of SNO2-like copies is given by the sum of relative CNV over the three loci.	SNO3	S288C, Chr. VI: complement(10301..10969)	46608..47276	669	190.8	526695	4.12624	4.60624	2	2.60624
			SNO2-7	H4, unitig 521: 6196..6864	86771..87439	669	190.8	5183	0.0406047
			SNO2-6	H4, Chr. X: complement(4394..5062)	58481..59149	669	190.8	56087	0.439398
SNZ2-like	Several copies in bioethanol strains.	The representation of SNZ2-like copies is given by the sum of relative CNV over the three loci.	SNZ3	S288C, Chr. VI: 11363..12259	47670..48566	897	190.8	854821	4.99464	5.03249	2	3.03249
			SNZ2-7	H4, unitig 521: 5037..5759	85612..86334	723	190.8	0	0
			SNZ2-6	H4, Chr. X: 5462..6358	59549..60445	897	190.8	6477	0.0378445
THI5-like	Several copies in bioethanol strains.	The representation of THI5-like copies is given by the sum of relative CNV over the locus.	THI5	S288C, Chr. VI: 12929..13951	49236..50258	1023	190.8	1113441	5.70444	5.70444	4	1.70444
Region on H4 Chr. 10 left arm	H4 has a non-S288C region on the left arm of Chr. X.	Calculation of copy numbers over the 10 coding frames spanning the region, divided by 10.	DDI2-6	H4, Chr. X: 3519..4211	57606..58298	693	190.8	2510	0.0189829	0.0111397	0	0.0111397
			SNO2-6	H4, Chr. X: complement(4394..5062)	58481..59149	669	190.8	5183	0.0406047
			SNZ2-6	H4, Chr. X: 5462..6358	59549..60445	897	190.8	6477	0.0378445
			EO220_2973	H4, Chr. X: complement(7170..8585)	61257..62672	1416	190.8	134	0.000495979
			EO220_2975	H4, Chr. X: 12456..14315	66543..68402	1860	190.8	400	0.00112712
			EO220_2976	H4, Chr. X: complement(15182..16048)	69269..70135	867	190.8	194	0.00117275
			EO220_2977	H4, Chr. X: 16791..18431	70878..72518	1641	190.8	0	0
			EO220_27690		73342..75276	1935		1534
			EO220_2978	H4, Chr. X: 19255..21189	73342..75276	1935	190.8	1534	0.00415495
			EO220_2979	H4, Chr. X: complement(22631..24232)	76718..78319	1602	190.8	278	0.000909503
			EO220_2980	H4, Chr. X: 25107..26198	79194..80285	1092	190.8	1272	0.00610501
SAM-dependent methyl transferases	Represents a family of non-S288C genes widespread among bioethanol strains.	The copy numbers of SAM-dependent methyltransferases is given by the sum of copy numbers over the three loci.	EO220_2964	H4, Chr. IX: complement(424342..425199)	90391..91248	858	190.8	154607	0.944416	0.998073	0	0.998073
			EO220_2974	H4, Chr. X: 9364..10221	63451..64308	858	190.8	1903	0.0116245
			EO220_6210	H4, unitig 521: 9364..10221	83652..84509	858	190.8	6881	0.0420326
ECM34/YHL042W region	H3 has two copies of the region, while S288C has one.	The copy numbers of region is given by the sum of copy numbers over its two genes, divided by two.	ECM34	S288C, Chr. VIII: 14901..15413	92749..93261	513	190.8	190592	1.94719	1.92447	1	0.924467
			YHL042W	S288C, Chr. VIII: 15667..16119	93515..93967	453	190.8	164372	1.90174
CUP1	H3 and H4 have several copies of CUP1.	Absolute CNV over the gene.	CUP1-1	S288C, Chr. VIII: complement(212535..212720)	94968..95153	186	190.8	614952	17.3281	17.3281	14	3.32806
Region B	Represents a non-S288C region.	The copy numbers of Region B is given by the sum of copy numbers over its five genes, divided by five.	EO220_1838	H4, Chr. VI: 207968..208951	96667..97650	984	190.8	559146	2.97819	2.90295	0	2.90295
			EO220_1839	H4, Chr. VI: 212221..213402	100920..102101	1182	190.8	585365	2.59556
			EO220_1840	H4, Chr. VI: complement(215213..216724)	103912..105423	1512	190.8	850536	2.94824
			EO220_1841	H4, Chr. VI: 217205..221068	105904..109767	3864	190.8	2167195	2.93956
			EO220_1842	H4, Chr. VI: complement(221130..223094)	109829..111793	1965	190.8	1144713	3.0532
Region on Chr. 6 (non-S288C)	Represents a non-S288C region.	The copy numbers of region is given by the sum of copy numbers over its four genes, divided by four. EO220_16460 is a partial sequence of the corresponding gene, its 5' region has repetitions on the genome and is thus excluded.	EO220_1758	H4, Chr. VI: complement(32679..34589)	112963..114873	1911	190.8	412201	1.1305	1.00404	0	1.00404
			EO220_1759	H4, Chr. VI: complement(37546..39216)	117830..119500	1671	190.8	294843	0.924775
			EO220_1760	H4, Chr. VI: 39796..41430	120080..121714	1635	190.8	323388	1.03664
			EO220_1761 (partial)	H4, Chr. VI: complement(43413..46386)	123697..126670	2974	190.8	524449	0.924238
VTH2	Three genes in a region that is missing in both H3 and H4 genomes.	CNV over each gene is calculated separately.	VTH2	S288C, Chr. X: 11475..16124	131200..135849	4650	190.8	943877	1.06386	1.06386	2	-0.936141
YJL218W			YJL218W	S288C, Chr. X: 21973..22563	141698..142288	591	190.8	0	0	0	1	-1
REE1			REE1	S288C, Chr. X: 23133..23729	142858..143454	597	190.8	0	0	0	1	-1
VBA3(5)/GEX1(2) region	The region (comprising VBA5, GEX2) is missing from the H3 genome.	Copy numbers relative to VBA5 and GEX2 are counted. The copy numbers of the region is given by the sum of copy numbers over these two genes, divided by two.	VBA5	S288C, Chr. XI: complement(658716..660464)	144823..146571	1749	190.8	354314	1.06174	1.07252	2	-0.927476
			GEX2	S288C, Chr. XI: 661442..663289	147549..149396	1848	190.8	381971	1.0833
ERR2/HSP32 region	S288C has three copies of this region, while some bioethanol strains have lower copy numbers.	Only copy numbers relative to HSP32 are counted.	HSP32	S288C, Chr. XVI: 11887..12600	157444..158157	714	190.8	417486	3.06454	3.06454	3	0.0645403
FEX1(2)/FDH1(2) region	Three copies on the H3 and H4 genomes. Only two in the S288C genome.	The copy numbers of the region is given by the sum of copy numbers over the four genes, divided by four.	FEX2	S288C, Chr. XVI: complement(13228..14355)	158785..159912	1128	190.8	677163	3.14634	2.89408	2	0.894082
			YPL278C	S288C, Chr. XVI: complement(15053..15355)	160610..160912	303	190.8	175270	3.0317
			YPL277C	S288C, Chr. XVI: complement(15405..16868)	160962..162425	1464	190.8	781733	2.79859
			YPL276W + FDH2	S288C, Chr. XVI: 17948..19079	163505..164636	1132	190.8	561497	2.5997
SAM3/4	Two copies of the region on H3 and H4, but only one in S288C.	The copy numbers of the region is given by the sum of copy numbers over the two genes, divided by two.	SAM3	S288C: Chr. XVI: 22938..24701	168495..170258	1764	190.8	743588	2.2093	2.12068	1	1.12068
			SAM4	S288C: Chr. XVI: 25087..26064	170644..171621	978	190.8	379188	2.03206
MAL33	H3 and H4 have higher copy numbers of the MAL cluster when compared to S288C.	MAL23 is 77% identical to MAL33. Both summed account for the number of copies of MAL activators encoded in the genome of H3 and H4.	MAL33	S288C, Chr. II: 800523..801929	203992..205398	1407	190.8	354159	1.31925	1.31925	1	0.319246
			MAL23		403356..404768
MAL31			MAL31	S288C, Chr. II: complement(802631..804475)	206100..207944	1845	190.8	1040515	2.95579	2.95579	1	1.95579
MAL12/MAL32		MAL12 and MAL32 have 99% identity and are counted together.	MAL32	S288C, Chr. II: 805351..807105	208820..210574	1755	190.8	743445	2.22021	2.81251	1	1.81251
			MAL12	S288C: Chr. VII: 1076599..1078353	185433..187187	1755	190.8	198335	0.592303
MAL13	Added to probe CNVs over the further MAL homologues.	Absolute CNV over the gene.	MAL13	S288C: Chr. VII: 1070293..1071714	179127..180548	1422	190.8	260412	0.959805	0.959805	1	-0.040195
MAL11		Absolute CNV over the gene.	MAL11	S288C: Chr. VII: complement(1073963..1075813)	182797..184647	1851	190.8	321549	0.910463	0.910463	1	-0.0895368
AQY3 region	H3 and H4 have two copies of the region, while S288C has one.	The copy numbers of the region is given by the sum of copy numbers over the four genes, divided by four.	AGP3	S288C: Chr. VII: 17004..18680	189702..191378	1677	190.8	646156	2.01942	1.91725	1	0.91725
			AQY3	S288C: Chr. VII: complement(20847..22787)	193545..195485	1941	190.8	701587	1.89443
			DAK2	S288C: Chr. VII: 23423..25198	196121..197896	1776	190.8	642915	1.89728
			ZNF1	S288C: Chr. VII: 28232..29629	200930..202327	1398	190.8	495566	1.85787
MPR1/EO220_1748	A non-S288C region.	The copy numbers of the region is given by the sum of copy numbers over the two genes, divided by two.	EO220_1748	H4, Chr. VI: complement(3636..4295)	217969..218628	660	190.8	275451	2.18737	2.06773	0	2.06773
			MPR1	H4, Chr. VI: 7691..8380	222024..222713	690	190.8	256469	1.94808
MCH2 Region	Some bioethanol strains have amplifications of this region.	The copy numbers of the region is given by the sum of copy numbers over the two genes, divided by two.	YKL222C	S288C, Chr. XI: complement(3503..5620)	257866..259983	2118	190.8	386222	0.955724	1.01808	1	0.0180815
			MCH2	S288C, Chr. XI: 6107..7528	260470..261891	1422	190.8	293142	1.08044
FRE2 Region	Some bioethanol strains have amplifications of this region.	The copy numbers of the region is given by the sum of copy numbers over the four genes, divided by four.	FRE2	S288C, Chr. XI: complement(9091..11226)	263454..265589	2136	190.8	417473	1.02435	1.01616	1	0.0161562
			SRY1	S288C, Chr. XI: complement(17359..18339)	271722..272702	981	190.8	175093	0.935452
			JEN1	S288C, Chr. XI: 22234..24084	276597..278447	1851	190.8	381598	1.08049
			URA1	S288C, Chr. XI: 25215..26159	279578..280522	945	190.8	184693	1.02433
ARR region	Amplified in some bioethanol strains.	The copy numbers of the region is given by the sum of copy numbers over the six genes, divided by six.	YPR195C	S288C, Chr. XVI: complement(927965..928294)	282194..282523	330	190.8	65170	1.03504	1.028	1	0.028001
			YPR196W	S288C, Chr. XVI: 931376..932788	285605..287017	1413	190.8	345628	1.282
			SGE1	S288C, Chr. XVI: 934034..935665	288263..289894	1632	190.8	342828	1.10098
			ARR1	S288C, Chr. XVI: complement(938148..939032)	292377..293261	885	190.8	143444	0.849495
			ARR2	S288C, Chr. XVI: complement(939279..939671)	293508..293900	393	190.8	63309	0.844296
			ARR3	S288C, Chr. XVI: 939922..941136	294151..295365	1215	190.8	244851	1.0562
GAP1	Amplified in some bioethanol strains.	Absolute CNV over the gene.	GAP1	S288C, Chr. XI: 515063..516871	297343..299151	1809	190.8	373108	1.08098	1.08098	1	0.0809799
FIT1/2 FRE5 larger Del	Region deleted in some bioethanol strains.	The larger deletion includes all genes from the region and is calculated by summing YOR381W-A, YOR385W, PHR1, divided by three.	YOR381W-A	S288C, Chr. XV: 1058423..1058590	304096..304263	168	190.8	35970	1.12215	1.05625	1	0.0562497
FIT1/2 FRE5 Del		The copy numbers of this region is given by the sum of copy numbers over the FIT1/2, FRE5 genes, divided by three.	FIT2	S288C, Chr. XV: 1059531..1059992	305204..305665	462	190.8	82064	0.930963	1.0051	1	0.00509894
			FIT3	S288C, Chr. XV: complement(1060441..1061055)	306114..306728	615	190.8	109123	0.929957
			FRE5	S288C, Chr. XV: 1061564..1063648	307237..309321	2085	190.8	459232	1.15438
			YOR385W	S288C, Chr. XV: 1065043..1065915	310716..311588	873	190.8	175522	1.05375
			PHR1	S288C, Chr. XV: 1066839..1068536	312512..314209	1698	190.8	321659	0.992841
MRS2/ALA1/KRE5 region	The region is amplified on the H3 and H4 genomes when compared to S288C.	The copy numbers of this region is given by the sum of copy numbers over the three genes, divided by three.	MRS2	S288C, Chr. XV: 944596..946008	341982..343394	1413	190.8	527102	1.95512	1.93774	1	0.937744
			ALA1	S288C, Chr. XV: complement(946233..949109)	343619..346495	2877	190.8	1014999	1.84904
			KRE5	S288C, Chr. XV: 949773..953870	347159..351256	4098	190.8	1570884	2.00906
MAK32 region	The region is amplified in some bioethanol strains.	The copy numbers of the region is given by the sum of copy numbers over the 13 genes, divided by 13.	MAK32	S288C, Chr. III: 152837..153928	353311..354402	1092	190.8	200423	0.961937	1.07987	1	0.0798728
			PET18	S288C, Chr. III: complement(154012..154659)	354486..355133	648	190.8	116319	0.9408
			MAK31	S288C, Chr. III: complement(154830..155096)	355304..355570	267	190.8	55367	1.08683
			HTL1	S288C, Chr. III: 155320..155556	355794..356030	237	190.8	46016	1.01761
			HSP30	S288C, Chr. III: complement(156109..157107)	356583..357581	999	190.8	219300	1.15052
			YCR022C	S288C, Chr. III: complement(157421..157765)	357895..358239	345	190.8	61349	0.931987
			YCR023C	S288C, Chr. III: complement(158538..160373)	359012..360847	1836	190.8	373641	1.0666
			SLM5	S288C, Chr. III: complement(160744..162222)	361218..362696	1479	190.8	308488	1.09318
			YCR024C-B	S288C, Chr. III: complement(162599..162865)	363073..363339	267	190.8	61920	1.21546
			PMP1	S288C, Chr. III: complement(162945..163067)	363419..363541	123	190.8	35009	1.49175
			YCR025C	S288C, Chr. III: complement(163446..163856)	363920..364330	411	190.8	68747	0.876665
			NPP1	S288C, Chr. III: complement(164111..166339)	364585..366813	2229	190.8	539908	1.2695
			RHB1	S288C, Chr. III: complement(167370..167999)	367844..368473	630	190.8	112451	0.935501
HIS1/FCY2 region	The region is amplified in some bioethanol strains.	The copy numbers of this region is given by the sum of copy numbers over the two genes, divided by two.	HIS1	S288C, Chr. V: complement(264892..265785)	377256..378149	894	190.8	173395	1.01653	1.07769	1	0.0776927
			FCY2	S288C, Chr. V: complement(266512..268113)	378876..380477	1602	190.8	348104	1.13885
PGU1	Deleted in most bioethanol strains, but present in S288C.	Absolute CNV over the gene.	PGU1	S288C, Chr. X: 722815..723900	386840..387925	1086	190.8	0	0	0	1	-1
NRT1	Amplified in some bioethanol strains.	Absolute CNV over the gene.	NRT1	S288C, Chr. XV: complement(459480..461276)	389926..391722	1797	190.8	352554	1.02825	1.02825	1	0.0282511
ARN2	Deleted in most bioethanol strains, but present in S288C.	Absolute CNV over the gene.	ARN2	S288C, Chr. VIII: complement(8351..10213)	395961..397823	1863	190.8	46	0.00012941	0.00012941	1	-0.999871
MNN1	Amplified in some bioethanol strains.	Absolute CNV over the gene.	MNN1	S288C, Chr. V: 153520..155808	399861..402149	2289	190.8	467929	1.07141	1.07141	1	0.0714103

## Sheet: Supp_Table_4
SUPPLEMENTARY TABLE 4 | Genome coverage of strains from the Brazilian bioethanol group obtained by mapping Illumina reads to the S288C reference.
Yeast Isolate	Average Coverage	Run accession
H3	190.817	ERR3284721
H4	213.598	ERR3284722
BG-1	368.322	SRR5004827
AFR	286.198	ERR1309137
BVC	212.521	ERR1308589
AEG	277.961	ERR1308731
AGM	478.57	ERR1309110
CNQ	265.682	ERR1309357
AEH	294.855	ERR1308847
AFD	203.131	ERR1308983
AHC	214.094	ERR1309041
BTT	209.622	ERR1308583
APH	226.56	ERR1308918
BTV	239.511	ERR1309375
BVA	280.213	ERR1309497
CMT	127.713	ERR1309134
CNG	236.987	ERR1308859
CNK	389.653	ERR1309329
APG	286.686	ERR1309220
CNM	231.349	ERR1308862
CNP	183.395	ERR1309465
CNR	250.585	ERR1309211
BVB	274.456	ERR1309103
CNI	319.49	ERR1308810
CNH	269.961	ERR1308925
BVH	84.1215	ERR1309123
CNN	215.987	ERR1309264
CNF	240.106	ERR1308869
CNB	354.225	ERR1309287
BVG	290.083	ERR1309184
CNE	325.498	ERR1308656
CNL	362.644	ERR1309339
BVD	250.135	ERR1309387
BVF	268.514	ERR1308860
CNS	189.075	ERR1309463
CNT	238.888	ERR1309424
BVE	283.007	ERR1309294
CNV	368.9	ERR1309157
BI002	113.489	SRR5678610
BI005	139.151	SRR5678581
SP004	89.4208	SRR5678661
SP006	169.007	SRR5678667

## Sheet: Supp_Table_5
SUPPLEMENTARY TABLE 5 | Strains unrelated to the bioethanol clade used as controls for CNV analysis.
Control strains used in the read depth analysis:
Isolate name	Standardized name	Clades	Isolation	Reference/collection	Genome sequencing accession number
DBVPG1790	BNV	Wine/European	Soil, Turku, Finland	DBVPG collection	ERR1309319 (Peter et al., 2018)
CBS3081	AHL	Alpechin	Alpechin, Spain	CBS collection	ERR1309499 (Peter et al., 2018)
SJ5L14	AMP	Mosaic region 1	Fruiting body of Auricularia auricular, Taian, Miaoli, Taiwan	Naumov et al., 2013	ERR1309121 (Peter et al., 2018)
EXF-7197	BFP	Mediterranean oak	Quercus sp., Montenegro	University of Ljubljana, Slovenia	ERR1309488 (Peter et al., 2018)
CLIB560	BGM	French dairy	Dairy, cheese, Normandy, France	CLIB collection	ERR1309503 (Peter et al., 2018)
CLIB655	BHA	African beer	Beer leaven for Bili Bili beer, brewery, Chad	CLIB collection	ERR1308836 (Peter et al., 2018)
DBVPG6590	BRM	Mosaic beer	Alcohol production tank, Brazil	DBVPG collection	ERR1309517 (Peter et al., 2018)
CLIB1070	BHG	Mosaic region 2	Cider brewery, Normandy, France	CLIB collection	ERR1308969 (Peter et al., 2018)
NCYC_2925	BMG	Mixed origin	Human sputum, Norway	National Collection of Yeast Cultures (NCYC)	ERR1309341 (Peter et al., 2018)
LCBG-4Y3	CPL	Mexican agave	Agave spp. fermentation during rustic mezcal production, Mexico	Instituto Politécnico Nacional - Centro de Biotecnología Genómica	ERR1309336 (Peter et al., 2018)
Control strains used in genome BLASTN analysis:
Isolate name	Standardized name	Clades	Isolation	Reference/collection	Genome sequencing accession
YJM454_1b	ABH	Mosaic region 3	Human, clinical	Kruglyak Laboratory	https://www.genoscope.cns.fr/yeast/ (Istace et al., 2017)
CLIB324_2	ADM	Mixed origin	Bakery, Vietnam	CLIB collection	https://www.genoscope.cns.fr/yeast/ (Istace et al., 2017)
K12_2	ADQ	Sake	Sake, Japan	Kruglyak Laboratory	https://www.genoscope.cns.fr/yeast/ (Istace et al., 2017)
T73_1b	ADS	Wine/European	Monastrel grape fermentation (red wine). Alicante, Spain	Kruglyak Laboratory	https://www.genoscope.cns.fr/yeast/ (Istace et al., 2017)
CLQCA_05-006	AKR	Asian fermentation	Rotten fruit. Guayas, Ecuador	National Collection of Yeast Cultures (NCYC)	https://www.genoscope.cns.fr/yeast/ (Istace et al., 2017)
YPS134	ANE	North American oak	Soil beneath Quercus velutina. Pennsylvania, USA	YPS collection / University of Pennsylvania, USA (Snigowski P.)	https://www.genoscope.cns.fr/yeast/ (Istace et al., 2017)
CLIB630	ASN	French dairy	Dairy cheese (camembert). Normandy, France	CLIB collection / Laboratoire de Technologie Laitiere, INA-PG	https://www.genoscope.cns.fr/yeast/ (Istace et al., 2017)
CECT10266	AVB	Alpechin	Tanning liquor. Spain	CECT collection	https://www.genoscope.cns.fr/yeast/ (Istace et al., 2017)
SX3	BAH	CHNII	Bark from Carya sp..Qinling Mountain, Shaanxi province, China	Chinese Academy of Sciences (Feng-Yan Bai)	https://www.genoscope.cns.fr/yeast/ (Istace et al., 2017)
HN6	BAL	CHNI	Rotten wood. Bawangling Mountain, Hainan province, China	Chinese Academy of Sciences (Feng-Yan Bai)	https://www.genoscope.cns.fr/yeast/ (Istace et al., 2017)
HN10	BAM	CHNIII	Rotten wood. Wuzhi Mountain, Hainan province, China	Chinese Academy of Sciences (Feng-Yan Bai)	https://www.genoscope.cns.fr/yeast/ (Istace et al., 2017)
HE015	BCN	French Guiana human	Human feces. French Guiana	Institut Pasteur (Christophe d'Enfert and Marie-Elisabeth Bougnoux)	https://www.genoscope.cns.fr/yeast/ (Istace et al., 2017)
#57	BDF	Mosaic region 3	Evolution canyon. Israel	Comenius University in Bratislava (Josef Nosek) and University of Haifa (Eviatar Nevo)	https://www.genoscope.cns.fr/yeast/ (Istace et al., 2017)
CLIB1071	BHH	Mosaic region 2	Cider brewery, dry cider. Lower Normandy, France	CLIB collection (Serge Casaregola)	https://www.genoscope.cns.fr/yeast/ (Istace et al., 2017)
3	CBM	Mosaic region 3	Chalcidoidea. Forest of Nehmten in Schleswig-Holstein, Germany	Max Planck Institute for Evolutionary Biology (Duncan Greig)	https://www.genoscope.cns.fr/yeast/ (Istace et al., 2017)
GE14S01-7B	CEI	Taiwanese	Soil. Taiwan	State Research Institute of Genetics and Selection of Industrial Microorganisms	https://www.genoscope.cns.fr/yeast/ (Istace et al., 2017)
Dji2-2A(a)	CFA	African palm wine	Palm wine. Djibouti	State Research Institute of Genetics and Selection of Industrial Microorganisms	https://www.genoscope.cns.fr/yeast/ (Istace et al., 2017)
6.2_WLP570	CFF	Mosaic beer	Carlsberg Beer. Belgium	Carlsberg	https://www.genoscope.cns.fr/yeast/ (Istace et al., 2017)
Ponton 11	CIC	Mosaic region 3	Human, clinical. Spain	Inserm Université P. M. Curie, Paris, France (Hennequin C.)	https://www.genoscope.cns.fr/yeast/ (Istace et al., 2017)
DBVPG6044	AKI	Mosaic region 3	Bili wine. West Africa	DBVPG collection (Benedetta Turchetti and Pietro Buzzini)	GCA_002079025.1 (Yue et al., 2017)
DBVPG6765		Wine/European			GCA_002057805.1 (Yue et al., 2017)
SK1	GAL	African palm wine	Lab strain. USA	Rosenstiel Basic Medical Sciences Research Center (James E Haber)	GCA_002057885.1 (Yue et al., 2017)
UWOPS034614					GCA_002058095.1 (Yue et al., 2017)
Y12	ACK	Asian fermentation	Palm wine. Ivory Coast	Kruglyak Laboratory	GCA_002058645.1 (Yue et al., 2017)
YPS128	AKN	North American oak	Soil beneath Quercus alba. Pennsylvania, USA	YPS collection / University of Pennsylvania, USA (Snigowski P.)	GCA_002057995.1 (Yue et al., 2017)

## Sheet: Supp_Table_6
SUPPLEMENTARY TABLE 6 | Industrial S. cerevisiae strains (according to Gallone et al., 2016) used for phylogenetic inference along bioethanol yeasts.
	Strain label	Niche	Origin	Subpopulation	BioSample
1	BE001	Beer	Belgium	Britain	SAMN05190362
2	BE002	Beer	Bulgaria	Beer2	SAMN05190363
3	BE003	Beer	Ukraine	Beer2	SAMN05190364
4	BE004	Beer	Belgium	Beer2	SAMN05190365
5	BE005	Beer (Ale)	Belgium	Mixed	SAMN05190366
6	BE006	Beer (Ale refermentation)	Unknown	Mixed	SAMN05190367
7	BE007	Beer (Ale)	US	US	SAMN05190368
8	BE008	Beer (Ale)	Germany	Belgium/Germany	SAMN05190369
9	BE009	Beer (Stout)	England	Britain	SAMN05190370
10	BE010	Beer	Scotland	Britain	SAMN05190371
11	BE011	Beer (Abbey)	Belgium	Beer2	SAMN05190372
12	BE012	Beer (Bitter)	England	Belgium/Germany	SAMN05190373
13	BE013	Beer (Ale refermentation)	Belgium	Beer2	SAMN05190374
14	BE014	Beer (Strong ale)	Belgium	Wine	SAMN05190375
15	BE015	Beer	Belgium	Belgium/Germany	SAMN05190376
16	BE016	Beer	Belgium	Belgium/Germany	SAMN05190377
17	BE017	Beer	Belgium	Mosaic	SAMN05190378
18	BE018	Beer	Canada	Mosaic	SAMN05190379
19	BE019	Beer	Canada	Mosaic	SAMN05190380
20	BE020	Beer	Belgium	Wine	SAMN05190381
21	BE021	Beer (Pale ale)	Canada	Beer2	SAMN05190382
22	BE022	Beer (Ale refermentation)	Belgium	Belgium/Germany	SAMN05190383
23	BE023	Beer (Ale refermentation)	Belgium	Mixed	SAMN05190384
24	BE024	Beer (Ale refermentation)	Belgium	Wine	SAMN05190385
25	BE025	Beer (Ale refermentation)	Belgium	Mixed	SAMN05190386
26	BE026	Beer (Ale refermentation)	Belgium	Belgium/Germany	SAMN05190387
27	BE027	Beer (Ale refermentation)	Belgium	Beer2	SAMN05190388
28	BE028	Beer (Ale refermentation)	Belgium	Mixed	SAMN05190389
29	BE029	Beer (Ale refermentation)	Belgium	Mixed	SAMN05190390
30	BE030	Beer (Trappist)	Belgium	Wine	SAMN05190391
31	BE031	Beer (Trappist)	Belgium	Belgium/Germany	SAMN05190392
32	BE032	Beer	England	Beer2	SAMN05190393
33	BE033	Beer (Strong ale)	England	Wine	SAMN05190394
34	BE034	Beer (Saison)	Belgium	Beer2	SAMN05190395
35	BE035	Beer (Trappist)	Belgium (UK origin)	Mosaic	SAMN05190396
36	BE036	Beer (Trappist)	Belgium (UK origin)	Britain	SAMN05190397
37	BE037	Beer (Trappist)	Belgium (UK origin)	Britain	SAMN05190398
38	BE038	Beer (Lager)	Unknown	Mixed	SAMN05190399
39	BE039	Beer (Lager)	Czech	Beer2	SAMN05190400
40	BE040	Beer (Lager)	US	Beer2	SAMN05190401
41	BE041	Beer (Lager)	Belgium	Belgium/Germany	SAMN05190402
42	BE042	Beer (Lager)	Belgium	Mosaic	SAMN05190403
43	BE043	Beer (Lager)	Belgium	Belgium/Germany	SAMN05190404
44	BE044	Beer (Pale ale)	US (California)	US	SAMN05190405
45	BE045	Beer (Bitter)	England	Britain	SAMN05190406
46	BE046	Beer	Germany	Belgium/Germany	SAMN05190407
47	BE047	Beer (Stout)	Ireland	Britain	SAMN05190408
48	BE048	Beer (Pale ale)	England	Britain	SAMN05190409
49	BE049	Beer (Pale ale)	England	Britain	SAMN05190410
50	BE050	Beer	England	Britain	SAMN05190411
51	BE051	Beer	US (East Coast)	US	SAMN05190412
52	BE052	Beer (Pale ale)	Australia	NS	SAMN05190413
53	BE053	Beer	Europe	Britain	SAMN05190414
54	BE054	Beer	England	Britain	SAMN05190415
55	BE055	Beer	England	Britain	SAMN05190416
56	BE056	Beer (Pale ale)	England	Britain	SAMN05190417
57	BE057	Beer	England	Mosaic	SAMN05190418
58	BE058	Beer	England	Mosaic	SAMN05190419
59	BE059	Beer	England	Beer2	SAMN05190420
60	BE060	Beer (Ale)	Scotland	Mosaic	SAMN05190421
61	BE061	Beer (Alt)	Germany	Mixed	SAMN05190422
62	BE062	Beer	England	Beer2	SAMN05190423
63	BE063	Beer	England	Beer2	SAMN05190424
64	BE064	Beer	England	Britain	SAMN05190425
65	BE065	Beer	US (California)	US	SAMN05190426
66	BE066	Beer (Pale ale)	US (Pacific North West America)	Britain	SAMN05190427
67	BE067	Beer	England	US	SAMN05190428
68	BE068	Beer (Pale ale)	US (California)	US	SAMN05190429
69	BE069	Beer	US (California)	Britain	SAMN05190430
70	BE070	Beer	France	Britain	SAMN05190431
71	BE071	Beer	US (San Diego)	US	SAMN05190432
72	BE072	Beer (Hefeweizen)	Germany	Mosaic	SAMN05190433
73	BE073	Beer (Hefeweizen)	Germany	Belgium/Germany	SAMN05190434
74	BE074	Beer (Hefeweizen)	Germany	Mosaic	SAMN05190435
75	BE075	Beer (Wheat)	Belgium	Belgium/Germany	SAMN05190436
76	BE076	Beer (Wheat)	Belgium	Belgium/Germany	SAMN05190437
77	BE077	Beer (Trappist)	Belgium	Belgium/Germany	SAMN05190438
78	BE078	Beer (Trappist)	Belgium	Belgium/Germany	SAMN05190439
79	BE079	Beer (Trappist)	Belgium	Britain	SAMN05190440
80	BE080	Beer	Belgium	Beer2	SAMN05190441
81	BE081	Beer (Ale)	Belgium	Belgium/Germany	SAMN05190442
82	BE082	Beer	Belgium	US	SAMN05190443
83	BE083	Beer (Saison)	Belgium	Beer2	SAMN05190444
84	BE084	Beer	Belgium	Beer2	SAMN05190445
85	BE085	Beer (Strong ale)	Belgium	Beer2	SAMN05190446
86	BE086	Beer	Belgium	Beer2	SAMN05190447
87	BE087	Beer (Lager)	Germany	Belgium/Germany	SAMN05190448
88	BE088	Beer	Germany	Wine	SAMN05190449
89	BE089	Beer	Germany	Britain	SAMN05190450
90	BE090	Beer	England	Britain	SAMN05190451
91	BE091	Beer (Lager)	Germany	Beer2	SAMN05190452
92	BE092	Beer (Strong ale)	Belgium	Beer2	SAMN05190453
93	BE093	Beer (Hefeweizen)	Germany	Mosaic	SAMN05190454
94	BE094	Beer (Lager)	Germany	Britain	SAMN05190455
95	BE095	Beer	Unknown	NS	SAMN05190456
96	BE096	Beer	Unknown	NS	SAMN05190457
97	BE097	Beer	Unknown	NS	SAMN05190458
98	BE098	Beer (Pale ale)	US (California)	US	SAMN05190459
99	BE099	Beer (Bitter)	England	Britain	SAMN05190460
100	BE100	Beer	England	Britain	SAMN05190461
101	BE101	Beer	England	Britain	SAMN05190462
102	BE102	Beer	US	US	SAMN05190463
103	BI001	Bioethanol	China	Asian	SAMN05190464
104	BI002	Bioethanol	Brazil	Mosaic	SAMN05190465
105	BI003	Bioethanol	China	Asian	SAMN05190466
106	BI004	Bioethanol	China	Asian	SAMN05190467
107	BI005	Bioethanol	Brazil	Mosaic	SAMN05190468
108	BR001	Bread	Unknown	Mixed	SAMN05190469
109	BR002	Bread	Belgium	Mixed	SAMN05190470
110	BR003	Bread	Belgium	Mixed	SAMN05190471
111	BR004	Bread	Belgium	Mixed	SAMN05190472
112	LA001	Lab	Lab cross	Mosaic	SAMN05190473
113	LA002	Lab	Lab cross	Mosaic	SAMN05190474
114	SA001	Saké	Japan	Asian	SAMN05190475
115	SA002	Saké	Japan	Wine	SAMN05190476
116	SA003	Saké	Japan	Asian	SAMN05190477
117	SA004	Saké	Japan	Asian	SAMN05190478
118	SA005	Saké	Japan	Asian	SAMN05190479
119	SA006	Saké	Japan	Asian	SAMN05190480
120	SA007	Saké	Japan	Asian	SAMN05190481
121	SP001	Spirits	Unknown	Mixed	SAMN05190482
122	SP002	Spirits	France	Wine	SAMN05190483
123	SP003	Spirits	Unknown	Mixed	SAMN05190484
124	SP004	Spirits	Brazil	Wine	SAMN05190485
125	SP005	Spirits	Brazil	Belgium/Germany	SAMN05190486
126	SP006	Spirits	Brazil	Mosaic	SAMN05190487
127	SP007	Spirits	Scotland	Mosaic	SAMN05190488
128	SP008	Spirits	Scotland	Mosaic	SAMN05190489
129	SP009	Spirits	US (Tennessee)	Mosaic	SAMN05190490
130	SP010	Spirits	Unknown	Mosaic	SAMN05190491
131	SP011	Spirits	Unknown	Wine	SAMN05190492
132	WI001	Wine	France	Wine	SAMN05190493
133	WI002	Wine	Russia	Mosaic	SAMN05190494
134	WI003	Wine	France	Wine	SAMN05190495
135	WI004	Wine	Germany	Wine	SAMN05190496
136	WI005	Wine	Germany	Wine	SAMN05190497
137	WI006	Wine	Germany	Wine	SAMN05190498
138	WI007	Wine	Germany	Wine	SAMN05190499
139	WI008	Wine	Unknown	Mosaic	SAMN05190500
140	WI009	Wine	Germany	Wine	SAMN05190501
141	WI010	Wine	France	Wine	SAMN05190502
142	WI011	Wine	France	Wine	SAMN05190503
143	WI012	Wine	Unknown	Britain	SAMN05190504
144	WI013	Wine	France	Wine	SAMN05190505
145	WI014	Wine	Germany	Wine	SAMN05190506
146	WI015	Wine	France	Wine	SAMN05190507
147	WI016	Wine	Italy	Mosaic	SAMN05190508
148	WI017	Wine	Spain	Wine	SAMN05190509
149	WI018	Wine	Unknown	Wine	SAMN05190510
150	WI019	Wine	Unknown	Mosaic	SAMN05190511
151	WL001	Wild (Cocoa)	Ghana	Mosaic	SAMN05190512
152	WL002	Wild (Cocoa)	Ghana	Mosaic	SAMN05190513
153	WL003	Wild (Cocoa)	Ivory coast	Mosaic	SAMN05190514
154	WL004	Wild	US	Asian	SAMN05190515
155	WL005	Wild	Denmark	Mixed	SAMN05190516
156	WL006	Wild	Denmark	Mixed	SAMN05190517
157	WL007	Wild	Denmark	Mixed	SAMN05190518

## Sheet: Supp_Table_7
SUPPLEMENTARY TABLE 7 | SNPs countings between H3 and H4 chromosomes.
	SNPs	Total SNPs/kbp	Genic SNPs/kbp	Intergenic SNPs/kbp
Chr. I	14	0.08	0.1	0.02
Chr. II	247	0.33	0.29	0.34
Chr. III	398	1.6	0.98	1.6
Chr. IV	1301	1.18	0.85	0.95
Chr. V	505	0.97	0.62	1.29
Chr. VI	8	0.03	0.04	0.01
Chr. VII	320	0.39	0.3	0.28
Chr. VIII	271	0.62	0.54	0.42
Chr. IX	779	1.95	1.64	2.09
Chr. X	730	1.25	1	1
Chr. XI	1056	1.68	1.19	2.11
Chr. XII	331	0.69	0.29	0.4
Chr. XIII	1454	1.88	1.49	1.8
Chr. XIV	411	0.98	0.54	0.52
Chr. XV	503	0.51	0.48	0.45
Chr. XVI	500	0.57	0.49	0.68
Total	8828	0.93	0.69	0.86

## Sheet: Supp_Table_8
SUPPLEMENTARY TABLE 8 | SNPs countings between H3 and S288C chromosomes.
	SNPs	Total SNPs/kbp	Genic SNPs/kbp	Intergenic SNPs/kbp
Chr. I	1532	9.33	4.87	11.15
Chr. II	3837	5.04	4.31	5.83
Chr. III	1204	4.31	3.29	4.28
Chr. IV	5426	3.8	3.3	4.68
Chr. V	2588	4.87	3.7	5.68
Chr. VI	1436	6.78	4.81	4.6
Chr. VII	4472	4.4	3.4	5.9
Chr. VIII	2288	4.43	4.05	4.73
Chr. IX	2560	6.26	4.9	7.99
Chr. X	2922	4.29	3.82	4.45
Chr. XI	2892	4.54	3.53	5.16
Chr. XII	4683	4.87	4.02	5.86
Chr. XIII	3122	3.61	3	4.39
Chr. XIV	2655	3.57	3	4.71
Chr. XV	4282	4.33	3.66	4.85
Chr. XVI	2895	3.35	2.71	4.26
Total	48794	4.41	3.6	5.26

## Sheet: Supp_Table_9
SUPPLEMENTARY TABLE 9 | SNPs countings between H4 and S288C chromosomes.
	SNPs	Total SNPs/kbp	Genic SNPs/kbp	Intergenic SNPs/kbp
Chr. I	1531	9.33	4.85	11.25
Chr. II	3754	4.93	4.22	5.74
Chr. III	1074	3.95	3.3	3.37
Chr. IV	5155	3.61	3.09	4.5
Chr. V	2644	4.98	3.88	6.09
Chr. VI	1591	7.07	4.79	6.12
Chr. VII	4366	4.33	3.35	5.05
Chr. VIII	2236	4.3	3.89	4.58
Chr. IX	2607	6.39	5.12	8.16
Chr. X	3176	4.7	4.18	5.01
Chr. XI	3063	4.71	3.81	6.3
Chr. XII	4608	4.81	3.98	5.73
Chr. XIII	3295	3.81	3.1	4.9
Chr. XIV	2612	3.5	2.96	4.58
Chr. XV	4632	4.61	3.82	5.31
Chr. XVI	2731	3.16	2.57	4
Total	49075	4.43	3.62	5.33

## Sheet: Supp_Table_10
SUPPLEMENTARY TABLE 10 | SNPs countings between H3 and JAY291 chromosomes.
	SNPs	Total SNPs/kbp	Genic SNPs/kbp	Intergenic SNPs/kbp
Chr. I	222	1.32	0.93	1.29
Chr. II	436	1.03	0.62	0.32
Chr. III	263	2.79	0.62	1.1
Chr. IV	788	1.06	0.52	0.56
Chr. V	594	2.19	1.14	0.79
Chr. VI	365	1.35	1.4	0.89
Chr. VII	438	0.83	0.22	0.84
Chr. VIII	641	2.12	1.15	1.3
Chr. IX	427	34.21	1.23	0.36
Chr. X	741	2.42	1.07	0.89
Chr. XI	496	1.26	0.46	1.21
Chr. XII	824	1.62	0.82	0.71
Chr. XIII	479	6.92	0.58	0.36
Chr. XIV	561	1.96	0.63	1
Chr. XV	542	3.63	0.44	0.67
Chr. XVI	456	1.1	0.39	0.77
Total	8273	1.67	0.66	0.77

[truncated: 7 more sheets: Supp_Table_11, Supp_Table_12, Supp_Table_13, Supp_Table_14, Supp_Table_15, Supp_Table_16, Supp_Table_17]
